# Supplementary material for: Catalytic Nanoceria Are Preferentially Retained in the Rat Retina and Are Not Cytotoxic after Intravitreal Injection
Source: PubMed Central journal article supplement (PMC3594235; doi:10.1371/journal.pone.0058431), 2013-03-11
Supplement: pone.0058431.s002.pdf [file pone.0058431.s002.pdf]

## Retention of nanoceria in the retina after a single intravitreal injection

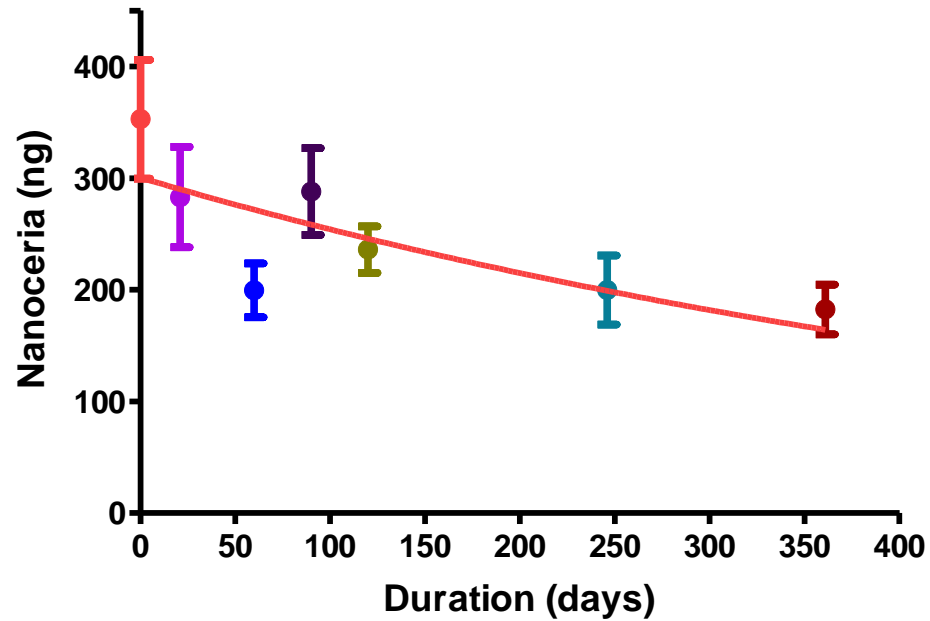

Half life of nanoceria in the retina is 414 days.
