# Supplementary material for: Catalytic Nanoceria Are Preferentially Retained in the Rat Retina and Are Not Cytotoxic after Intravitreal Injection
Source: PubMed Central journal article supplement (PMC3594235; doi:10.1371/journal.pone.0058431), 2013-03-11
Supplement: pone.0058431.s003.pdf [file pone.0058431.s003.pdf]

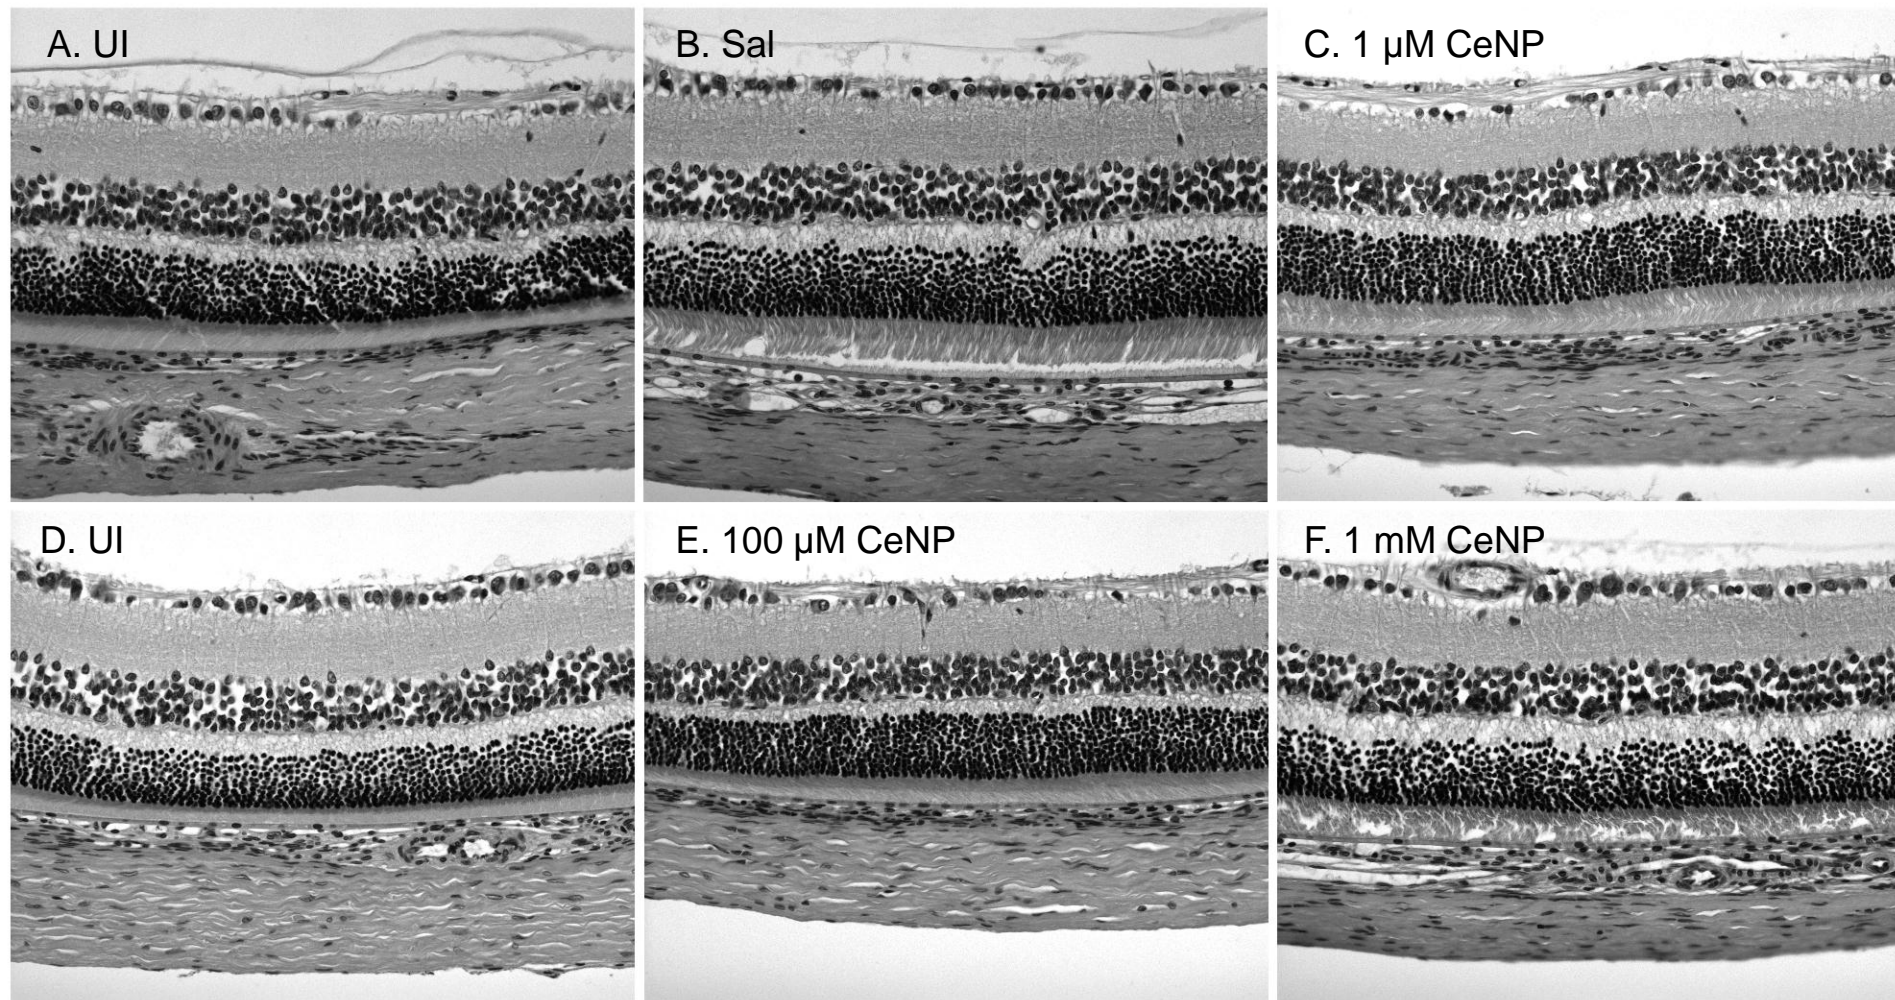

Photomicrographs of H&E stained retinal sections from adult SD rats nine days post nanoceria (CeNP) intravitreal injection. Images were taken at the same magnification using the 20X objective of a Nikon E800 microscope. We obtained sections through the central retina, i.e. through the optic nerve head. All images were taken at  $\sim 1$ mm from the optic nerve head in the inferior aspect of the retinal section. Abbreviations: UI=uninjected, Sal=saline injected, CeNP=nanoceria injected with the concentration indicated. A and D show sections from eyes of two different uninjected animals.
